# Supplementary material for: Volatile emissions during the 2021 Cumbre Vieja (La Palma) eruption integrating multiplatform atmospheric observations
Source: Copernicus journal article supplement (doi:10.5194/acp-25-14591-2025), 2025-11-04
Supplement: Supplementary file 1 [file Supplementary_data_Table_volatiles.xlsx]

## Sheet: Table S1
Table S1: groundmass glass contents in Cl, F and S measured simultaneously during the analyses published in Gonzalez-Garcia et al. (2023). These analyses were determined using a Cameca SX-100 electron microprobe (EMPA) at the Department of Geosciences of the University of Bremen (Germany), with an acceleration voltage of 15 kV, beam current of 10 nA and defocused beams of 10 µm. Counting times we…
Taquet, N., Boulesteix, T., Garcia, O.E. et al. New insights into the 2021 La Palma eruption degassing processes from direct-sun spectroscopic measurements. Atmospheric Chemistry and Physics.
References.
González-García, D., Boulesteix, T., Klügel, A., and Holtz, F.: Bubble-enhanced basanite–tephrite mixing in the early stages of the Cumbre Vieja 2021 eruption, La Palma, Canary islands, Sci Rep, 13, 14839, https://doi.org/10.1038/s41598-023-41595-3, 2023.

## Sheet: SM-Glass (spot)
Table S1.1 Groundmass glass spot analysis
Sample	Analysis #	Comment	Emplacement date	Oxides (wt%												Voilatiles (µg/g)
				SiO2	TiO2	Al2O3	FeO	MnO	MgO	CaO	Na2O	K2O	P2O5	Total		F	S	Cl
LM-2309	6 / 1 .	LM-2309_v01	2021-09-23	47.9649	3.367	17.0843	10.336	0.2433	3.8986	8.6607	5.7075	2.7401	1.5059	101.865		1987	684	898
LM-2309	7 / 1 .	LM-2309_v02	2021-09-23	47.6095	3.3619	16.8807	10.4653	0.2031	3.8892	8.8289	5.6275	2.7264	1.4322	101.391		1910	744	1010
LM-2309	8 / 1 .	LM-2309_v03	2021-09-23	48.1888	3.2303	16.8572	10.4869	0.2394	3.961	8.6693	5.6081	2.818	1.4258	101.825		1794	587	1025
LM-2309	9 / 1 .	LM-2309_v04	2021-09-23	48.0606	3.4035	17.4736	10.4371	0.2697	3.7999	9.2451	5.5321	2.6896	1.3646	102.568		1547	500	877
LM-2309	10 / 1 .	LM-2309_v05	2021-09-23	48.2002	3.4503	17.1231	10.521	0.2471	3.9469	8.7754	5.596	2.7245	1.5232	102.416		1527	608	951
LM-2309	11 / 1 .	LM-2309_v06	2021-09-23	48.0383	3.3565	17.201	10.6414	0.2503	3.9766	8.7454	5.5131	2.7943	1.4543	102.289		1676	537	967
LM-2309	12 / 1 .	LM-2309_v07	2021-09-23	47.1748	3.4248	16.8662	10.1096	0.257	3.8237	8.7387	5.4144	2.8601	1.5501	100.55		1725	597	989
LM-2309	13 / 1 .	LM-2309_v08	2021-09-23	48.0732	3.4117	17.1605	10.6731	0.2307	3.9613	8.7373	5.4496	2.7213	1.5965	102.336		1677	599	931
LM-2309	14 / 1 .	LM-2309_v09	2021-09-23	47.9424	3.5182	16.999	9.8013	0.2497	4.2344	9.181	5.4323	2.5971	1.4278	101.713		1893	470	940
LM-2309	15 / 1 .	LM-2309_v10	2021-09-23	44.5643	3.087	15.8494	13.4924	0.2702	3.8367	9.7625	6.1288	2.5841	1.4252	101.201		1285	314	411
LM-2309	16 / 1 .	LM-2309_v11	2021-09-23	48.0221	3.4418	17.0415	9.8204	0.2329	3.8425	8.4266	5.9212	2.8353	1.6123	101.528		1788	584	941
LM-2309	18 / 1 .	LM-2309_v13	2021-09-23	48.2365	2.9884	18.1794	9.8756	0.2246	3.3714	8.8527	5.6844	2.6181	1.4463	101.77		1595	493	842
LM-2309	19 / 1 .	LM-2309_v14	2021-09-23	47.7545	3.238	16.9077	10.5291	0.2469	3.6077	8.5191	5.8002	2.971	1.5961	101.513		1797	597	1029
PAR-2309-1	27 / 1 .	PAR-2309-1_v16	2021-09-23	48.3338	3.101	17.3068	9.9899	0.2552	3.9227	8.051	5.6915	2.8627	1.4017	101.257		1578	762	1064
PAR-2309-1	28 / 1 .	PAR-2309-1_v17	2021-09-23	48.5392	2.9589	17.4775	9.3314	0.222	3.6677	7.6794	6.031	3.0257	1.3371	100.569		1474	531	989
PAR-2309-1	29 / 1 .	PAR-2309-1_v18	2021-09-23	48.5051	2.9122	18.097	9.7822	0.212	3.4497	8.528	5.698	2.6121	1.2474	101.356		1616	543	962
PAR-2309-1	30 / 1 .	PAR-2309-1_v19	2021-09-23	49.4791	3.1033	16.9783	10.0994	0.2376	4.3277	8.9041	5.4021	2.5427	1.4591	102.868		1688	621	1034
PAR-2309-1	31 / 1 .	PAR-2309-1_v20	2021-09-23	50.1269	3.2203	17.9607	10.35	0.263	4.0516	7.9661	5.9977	2.8156	1.3619	104.453		1561	684	1147
PAR-2309-1	32 / 1 .	PAR-2309-1_v21	2021-09-23	44.1293	4.8394	16.2811	15.3711	0.2867	4.0296	7.5507	5.2982	2.5189	1.271	101.896		1649	585	969
PAR-2309-1	33 / 1 .	PAR-2309-1_v22	2021-09-23	48.7444	3.0952	18.2225	9.6964	0.254	3.5192	8.1068	5.4428	2.6439	1.2868	101.344		1612	650	1057
PAR-2309-1	34 / 1 .	PAR-2309-1_v23	2021-09-23	48.3858	2.9903	17.2845	10.1735	0.2644	3.7095	8.0264	5.6001	2.9543	1.4978	101.25		1766	682	1185
PAR-2309-1	35 / 1 .	PAR-2309-1_v24	2021-09-23	49.0979	2.9468	17.5243	9.6063	0.2266	3.9928	8.8275	5.3513	2.6469	1.2432	101.792		1553	691	1036
PAR-2309-2	37 / 1 .	PAR-2309-2_v26	2021-09-23	49.3527	3.0699	17.6245	8.8236	0.2252	3.539	6.9659	6.6846	3.4604	1.5766	101.623		1587	413	1006
PAR-2309-2	39 / 1 .	PAR-2309-2_v28	2021-09-23	48.7739	3.2459	17.5157	10.1224	0.2437	3.7525	7.7004	5.6737	2.9246	1.3446	101.609		1576	496	1040
PAR-2309-2	42 / 1 .	PAR-2309-2_v31	2021-09-23	48.3736	3.0952	17.3007	9.9255	0.2655	3.6884	7.853	5.8219	2.859	1.4425	100.997		1730	991	994
CV21P-A1	45 / 1 .	CV21P-A1_v34	1-2/12/2021	46.4309	3.824	16.0991	12.7316	0.2374	4.2447	9.4823	4.6203	2.7233	1.4061	102.144		1934	630	876
CV21P-A1	46 / 1 .	CV21P-A1_v35	1-2/12/2021	46.4452	3.9321	16.2307	12.5184	0.2429	4.3501	9.9596	4.6955	2.6233	1.2377	102.57		1976	545	830
CV21P-A1	47 / 1 .	CV21P-A1_v36	1-2/12/2021	46.325	3.8003	16.3417	12.6217	0.2454	4.2593	9.3185	4.766	2.7661	1.3899	102.178		2041	555	849
CV21P-A1	48 / 1 .	CV21P-A1_v37	1-2/12/2021	46.5323	4.0584	16.3347	12.5165	0.2411	4.2502	9.6031	4.7112	2.6495	1.5544	102.787		1995	539	817
CV21P-A1	49 / 1 .	CV21P-A1_v38	1-2/12/2021	46.68	3.9909	16.3058	12.3159	0.29	4.2385	9.6185	5.175	2.7167	1.3431	103.001		1802	565	902
CV21P-A1	50 / 1 .	CV21P-A1_v39	1-2/12/2021	47.0873	3.7725	16.7385	11.9262	0.2483	4.0685	9.1052	5.2868	2.8203	1.3662	102.748		2022	401	860
CV21P-A1	53 / 1 .	CV21P-A1_v42	1-2/12/2021	46.2721	3.8301	16.295	12.3673	0.2277	4.2567	9.9065	4.5754	2.5979	1.4892	102.154		1937	602	818
CV21P-A1	54 / 1 .	CV21P-A1_v43	1-2/12/2021	45.6305	3.6793	16.1692	12.4561	0.2515	4.1882	9.4595	4.4986	2.482	1.4047	100.535		1723	589	839
CV21P-A1	55 / 1 .	CV21P-A1_v44	1-2/12/2021	46.9542	3.8949	16.4211	12.2645	0.249	4.352	9.7613	4.6524	2.4598	1.4056	102.728		1763	561	805
CV21P-A1	57 / 1 .	CV21P-A1_v46	1-2/12/2021	45.646	3.5787	16.34	12.0881	0.2228	4.1847	9.8221	5.1173	2.365	1.388	101.056		1622	600	812
CV21P-A1	58 / 1 .	CV21P-A1_v47	1-2/12/2021	46.0597	3.7909	16.3457	11.9943	0.239	4.2343	9.4564	5.2195	2.362	1.334	101.337		1688	556	774
CV21P-A1	59 / 1 .	CV21P-A1_v48	1-2/12/2021	47.5084	3.5607	16.9837	10.9507	0.2119	4.0975	8.0697	5.7605	3.7041	1.4971	102.7		2000	534	1019
CV21P-A1	60 / 1 .	CV21P-A1_v49	1-2/12/2021	48.0189	3.6635	17.0373	10.8528	0.2193	4.2011	8.5105	5.6425	3.4987	1.4283	103.424		2046	353	1111
CV21P-A1	61 / 1 .	CV21P-A1_v50	1-2/12/2021	48.3575	3.7365	17.2069	10.2528	0.2173	3.91	8.2227	5.7655	3.6153	1.4851	103.114		1775	539	1126
CV21P-A1	62 / 1 .	CV21P-A1_v51	1-2/12/2021	47.4736	3.6862	16.8941	10.9411	0.2604	4.1519	8.1954	5.9005	3.1586	1.4136	102.418		1941	528	953
CV21P-B1	13 / 1 .	CV21P-B1_v60	26/09-10/10/2021	46.852	3.717	16.467	11.525	0.22	4.153	9.239	5.33	2.566	1.204	101.548		1500	380	860
CV21P-B1	14 / 1 .	CV21P-B1_v61	26/09-10/10/2021	46.535	3.87	16.402	11.471	0.286	4.043	9.366	5.267	2.531	1.183	101.224		1480	350	870
CV21P-B1	15 / 1 .	CV21P-B1_v62	26/09-10/10/2021	46.476	3.699	16.959	11.341	0.24	4.107	9.189	5.481	2.598	1.293	101.682		1630	410	950
CV21P-B1	16 / 1 .	CV21P-B1_v63	26/09-10/10/2021	46.469	3.677	16.699	11.004	0.258	4.07	9.228	5.401	2.62	1.268	100.995		1690	390	920
CV21P-B1	17 / 1 .	CV21P-B1_v64	26/09-10/10/2021	46.577	3.704	16.581	11.6	0.195	4.023	9.374	5.319	2.534	1.261	101.46		1660	410	860
CV21P-B1	18 / 1 .	CV21P-B1_v65	26/09-10/10/2021	46.429	3.695	16.545	11.349	0.231	4.108	9.432	5.481	2.553	1.228	101.332		1460	450	900
CV21P-B1	19 / 1 .	CV21P-B1_v66	26/09-10/10/2021	47.377	3.705	16.827	11.344	0.254	4.021	9.346	5.461	2.611	1.197	102.416		1490	350	910
CV21P-B1	20 / 1 .	CV21P-B1_v67	26/09-10/10/2021	46.925	3.571	16.847	11.519	0.234	4.087	9.255	5.46	2.703	1.365	102.25		1600	360	880
CV21P-B1	21 / 1 .	CV21P-B1_v68	26/09-10/10/2021	47.029	3.672	16.737	11.373	0.255	4.108	9.081	5.406	2.651	1.165	101.753		1570	350	850
CV21P-B1	22 / 1 .	CV21P-B1_v69	26/09-10/10/2021	46.515	3.87	16.783	11.297	0.195	3.997	9.159	5.399	2.445	1.184	101.162		1540	510	1140
CV21P-B1	23 / 1 .	CV21P-B1_v70	26/09-10/10/2021	46.863	3.644	16.768	11.265	0.233	4.11	9.226	5.364	2.566	1.229	101.557		1610	390	910
CV21P-B1	24 / 1 .	CV21P-B1_v71	26/09-10/10/2021	46.995	3.703	16.493	11.281	0.258	3.988	9.082	5.335	2.575	1.199	101.189		1570	360	860

## Sheet: SM-MI (spot)
Table S1.2 Melt inclusions spot analysis
Sample	Analysis #	Comment	Host (González-García et al., 2023; Tables SM3.3-3.5)	Emplacement date	Oxides (wt%												Voilatiles (µg/g)
					SiO2	TiO2	Al2O3	FeO	MnO	MgO	CaO	Na2O	K2O	P2O5	Total		F	S	Cl
LM-2309	17 / 1 .	LM-2309_v12_MI	CPx (LM-2309_CPx_core_m03)	2021-09-23	48.131	3.0839	18.0878	7.419	0.1857	4.0101	8.782	5.0191	2.3557	1.3641	98.4384		1709	3352	992
PAR-2309-2	36 / 1 .	PAR-2309-2_v25_MI	CPx (PAR-2309-2_CPx_rim_m35_next to inclusion)	2021-09-23	48.5837	3.0734	18.124	7.1215	0.2178	3.6428	8.6667	5.4705	2.3244	1.702	98.9268		1980	3196	1091
PAR-2309-2	38 / 1 .	PAR-2309-2_v27_MI	CPx (PAR-2309-2_CPx_core_m32)	2021-09-23	47.747	2.9815	17.5885	9.3092	0.2569	3.4386	8.8292	5.4399	2.3486	1.5332	99.4726		1425	2076	1192
PAR-2309-2	40 / 1 .	PAR-2309-2_v29_MI	Krs (PAR-2309-2_CPx_core_m36)	2021-09-23	47.0717	3.0125	17.3478	10.2087	0.2496	4.279	8.8807	5.7691	2.5014	1.3309	100.651		1561	1555	1134
PAR-2309-2	41 / 1 .	PAR-2309-2_v30_MI	Krs (PAR-2309-2_CPx_core_m36)	2021-09-23	47.4724	3.0945	17.2742	10.4128	0.2692	4.1105	8.5831	5.743	2.7184	1.2779	100.956		1918	2875	1010
CV21P-A1	43 / 1 .	CV21P-A1_v32_MI	CPx (line m41)	1-2/12/2021	48.7255	3.7375	17.995	8.441	0.2345	3.7026	9.8049	4.3141	2.4996	1.4001	100.855		1980	2871	1096
CV21P-A1	44 / 1 .	CV21P-A1_v33_MI	CPx (line m41)	1-2/12/2021	49.2909	3.7746	18.0602	8.3804	0.1977	3.6579	8.2298	5.0202	2.8233	1.39	100.825		1633	5627	931
CV21P-A1	51 / 1 .	CV21P-A1_v40_MI	CPx (CV21P-A1_CPx_core_m39)	1-2/12/2021	46.5288	3.5978	17.1677	10.6357	0.2746	4.479	10.0444	4.5165	1.8621	1.199	100.306		1077	7491	1143
CV21P-A1	52 / 1 .	CV21P-A1_v41_MI	CPx (CV21P-A1_CPx_core_m39)	1-2/12/2021	50.1175	2.6988	17.3334	9.6204	0.2473	3.4385	9.6367	4.8134	2.1527	0.5931	100.652		1630	2842	1059
CV21P-A1	56 / 1 .	CV21P-A1_v45_MI	CPx (CV21P-A1_CPx_mantle_m44_next to inclusion)	1-2/12/2021	48.3497	3.2589	17.5212	7.7809	0.1562	4.2916	9.3648	5.0801	2.1789	1.3957	99.378		1802	565	902
CV21P-B1	9 / 1 .	CV21P-B1_glass_v56_MI	CPx (CV21P-B1_CPx_core_m77_next to inclusion)	26/09-10/10/2021	47.731	3.45	17.911	7.303	0.225	4.59	9.369	4.831	1.987	1.379	98.776		1880	2910	810
CV21P-B1	10 / 1 .	CV21P-B1_glass_v57_MI	CPx (CV21P-B1_CPx_core_m74)	26/09-10/10/2021	48.311	3.518	17.62	6.899	0.185	4.365	8.945	5.273	2.287	1.264	98.667		1560	2970	990
CV21P-B1	11 / 1 .	CV21P-B1_glass_v58_MI	CPx (no data)	26/09-10/10/2021	48.636	3.382	17.537	4.949	0.191	3.697	9.401	5.24	2.246	1.301	96.58		1850	3140	960
CV21P-B1	12 / 1 .	CV21P-B1_glass_v59_MI	Ol (CV21P-B1_Ol_core_m69)	26/09-10/10/2021	41.151	3.715	15.192	12.317	0.224	4.513	11.671	4.027	1.723	0.888	95.421		1470	2870	820

## Sheet: SM-Glass standards
Table S1.3 Glass standards
#	Date	Volatiles (µg/g)
		F	S	Cl
		VG-2
4 / 1 .	2022-07-19	558	1538	313
21 / 1 .	2022-07-20	610	1525	285
22 / 1 .	2022-07-20	521	1591	337
63 / 1 .	2022-07-20	622	1560	294
64 / 1 .	2022-07-20	501	1616	325
1 / 1 .	2022-10-19	540	1550	300
Average		558.667	1563.33	309
sd		7.37216	5.19942	2.99537
Reference value		301	1420	330
deviation (%)		85.6035	10.0939	-6.36364
		VG-A99
5 / 1 .	2022-07-19	1154	151	194
23 / 1 .	2022-07-20	917	163	193
24 / 1 .	2022-07-20	1253	157	210
65 / 1 .	2022-07-20	927	169	229
66 / 1 .	2022-07-20	1059	145	224
Average		1062	157	210
sd		25.9544	1.69706	2.96917
Reference value		874	150	210
deviation (%)		21.5103	4.66667	0
		Hornblende Kakanui
3 / 1 .	2022-07-19	2070	205	238
25 / 1 .	2022-07-20	2077	230	246
26 / 1 .	2022-07-20	1959	190	243
67 / 1 .	2022-07-20	2058	194	269
68 / 1 .	2022-07-20	1985	202	201
Average		2029.8	204.2	239.4
sd		9.65766	2.79542	4.39017
Reference value		1673	-	237
deviation (%)		21.327	-	1.01266
Reference values for S and Cl in VG-2 and VG-A99 are information values from
compilations in the GeoReM data base (www.georem.mpch-mainz.gwdg.de/),
those for F and for Cl in the hornblende are results from Zhang et al. (2015).
