# Supplementary material for: Volatile emissions during the 2021 Cumbre Vieja (La Palma) eruption integrating multiplatform atmospheric observations
Source: Copernicus journal article supplement (doi:10.5194/acp-25-14591-2025), 2025-11-04
Supplement: Supplementary file [file acp-25-14591-2025-supplement-title-page.pdf › acp-25-14591-2025-supplement-title-page.pdf]

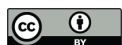

*Supplement of*

## **Volatile emissions during the 2021 Cumbre Vieja (La Palma) eruption integrating multiplatform atmospheric observations**

**Noémie Taquet et al.**

*Correspondence to:* Noémie Taquet (noemi.taquet@gmail.com) and Omaira García (ogarcia@aemet.es)

- [acp-25-14591-2025-supplement-title-page.pdf](#)
- [Supplementary\\_data\\_Table\\_volatiles.xlsx](#)

The copyright of individual parts of the supplement might differ from the article licence.
